# Supplementary material
Source: Springer Nature journal article supplement (https://www.springermedizin.de/resource/supplementary/12936_2009_1055_MOESM2_ESM.pdf/9548872)
Supplement: MOESM2 [file 9548872]

9°0'0"E

12°0'0"E

15°0'0"E

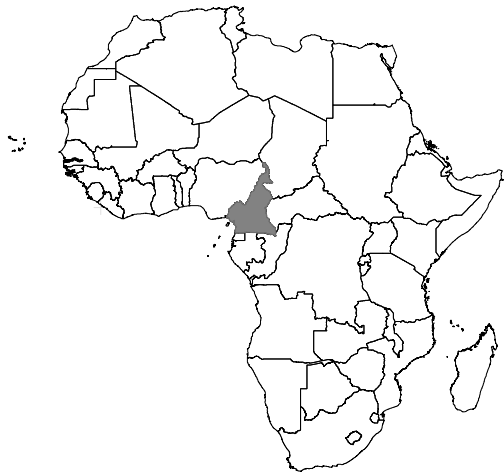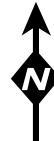

12°0'0"N

12°0'0"N

Sahelian

Bioclimatic domains

● + Sampled villages

● Villages

Tropical Dry

9°0'0"N

9°0'0"N

West  
Highlands

Adamaoua  
Highlands

6°0'0"N

6°0'0"N

Atlantic  
Coast

Yaounde

Central  
Plateau

3°0'0"N

3°0'0"N

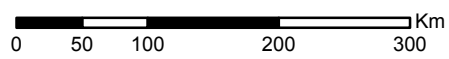

Source: Geonet Name Server, <https://www1.nga.mil/ProductsServices/GeographicNames/Pages/default.aspx>

9°0'0"E

12°0'0"E

15°0'0"E
